# Supplementary material
Source: publisher figshare collection journal article supplement (https://karger.figshare.com/ndownloader/files/14413457)
Supplement: Supplementary file 1 [file 14413457]

**Supplemental Figure 2 (Figure S2): Mutations in *PKD1* non-truncating group patients.**

NCBI reference sequences were used: *PKD1, NM_001009944.2*

**
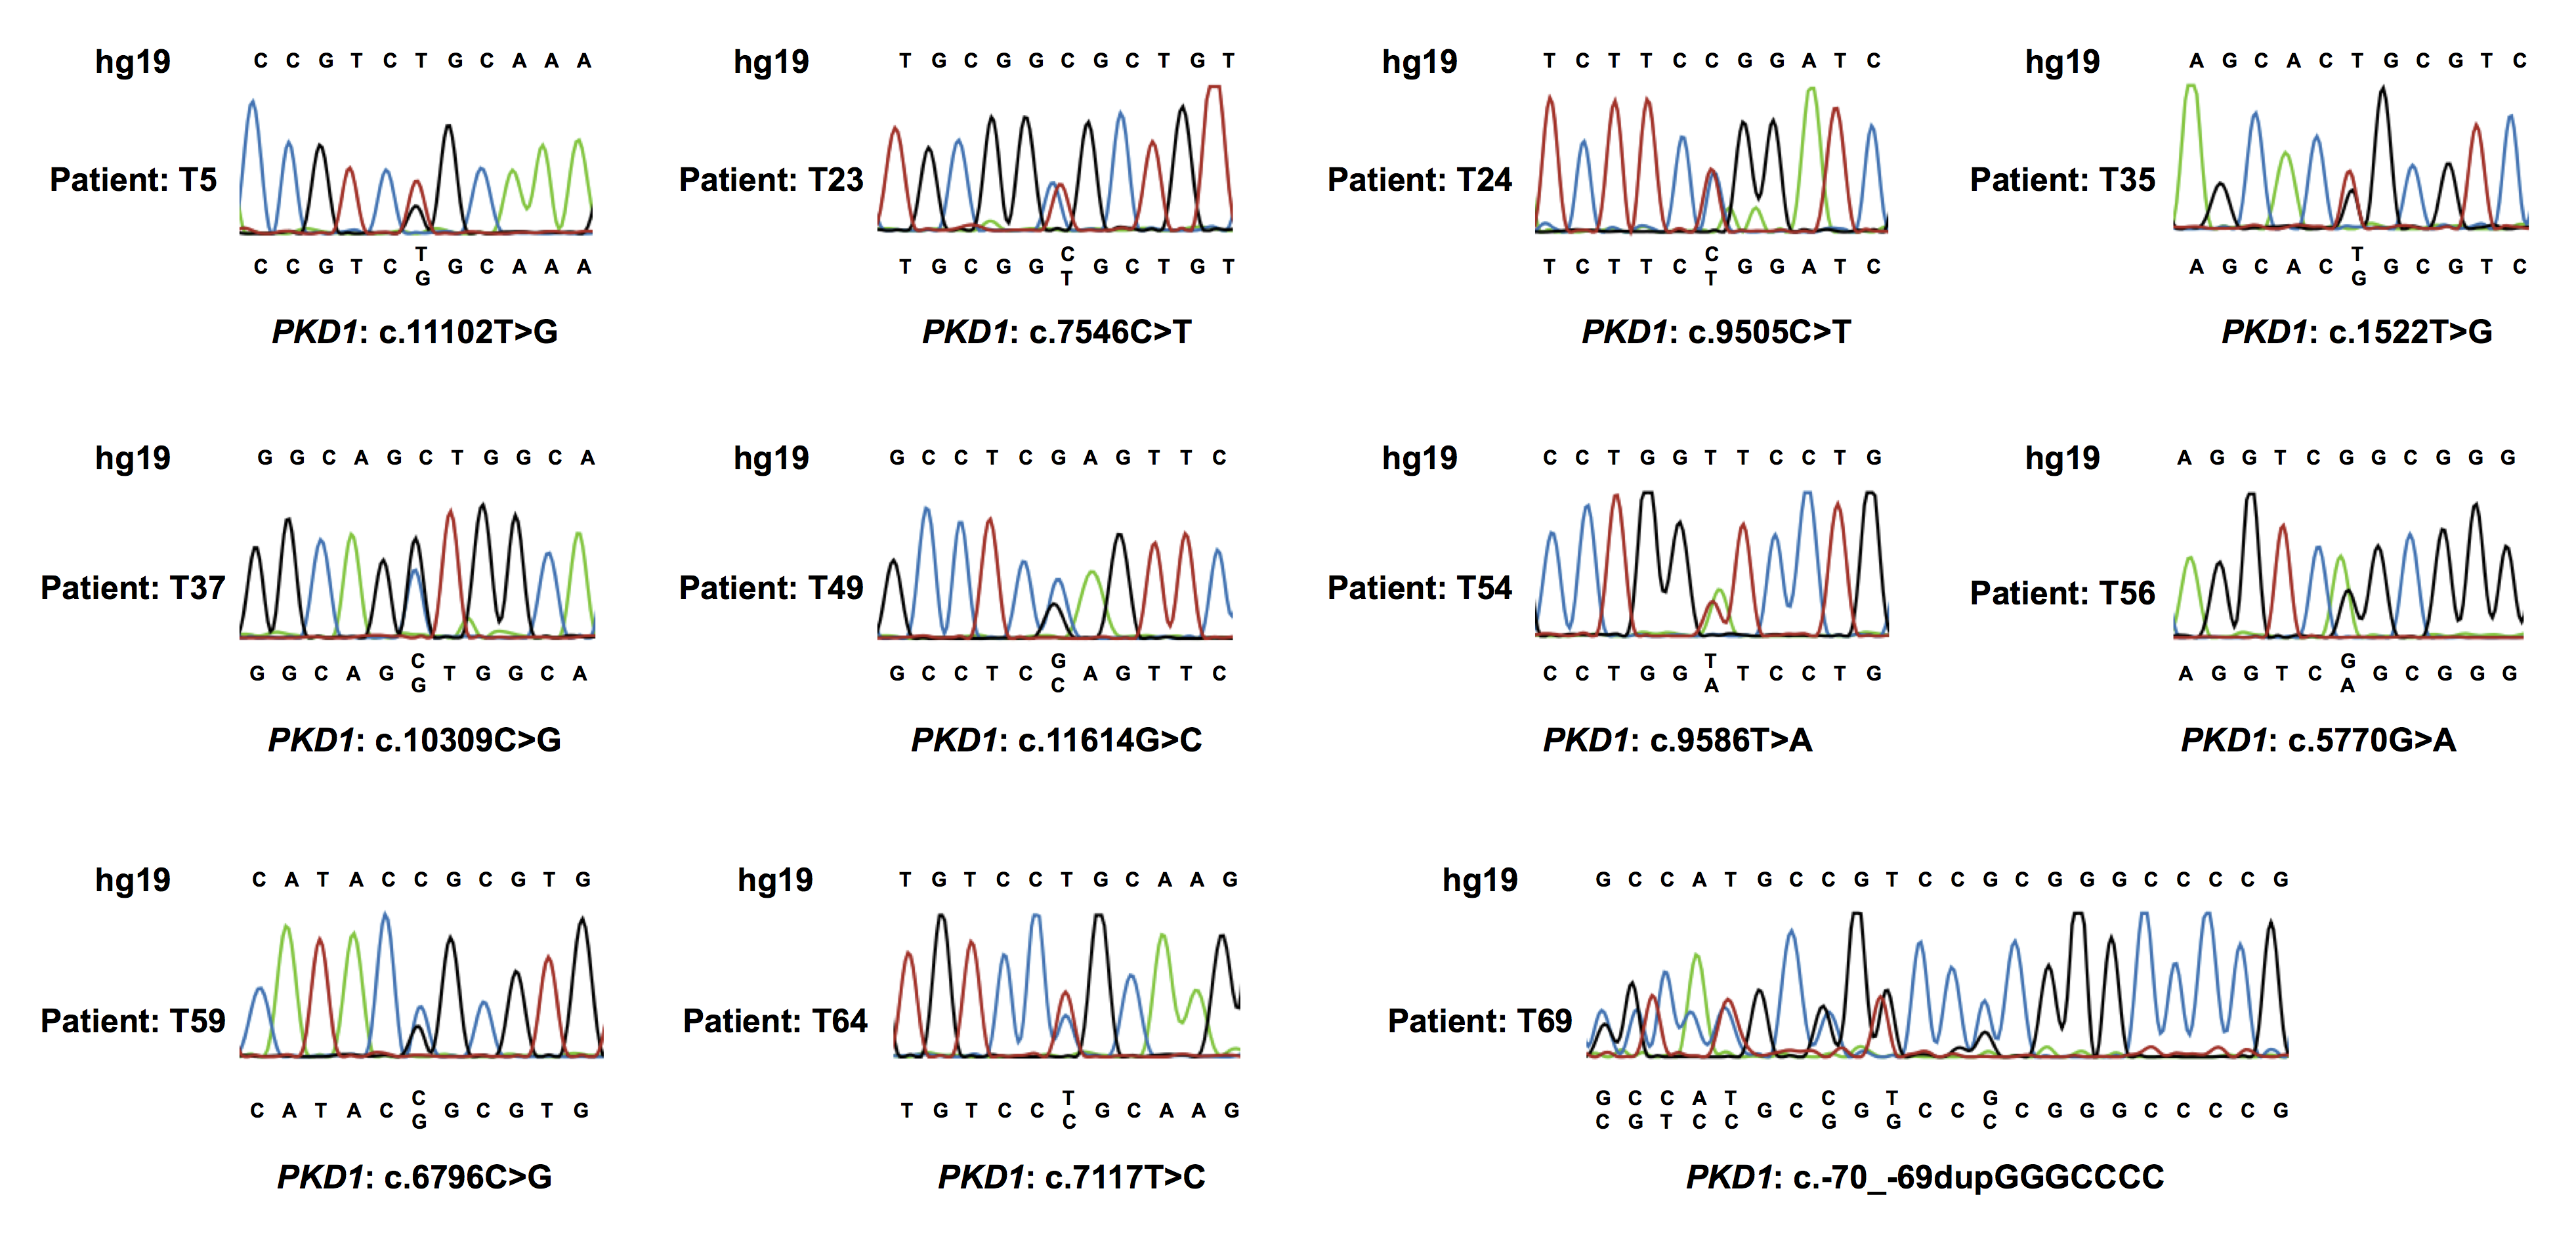
**

**
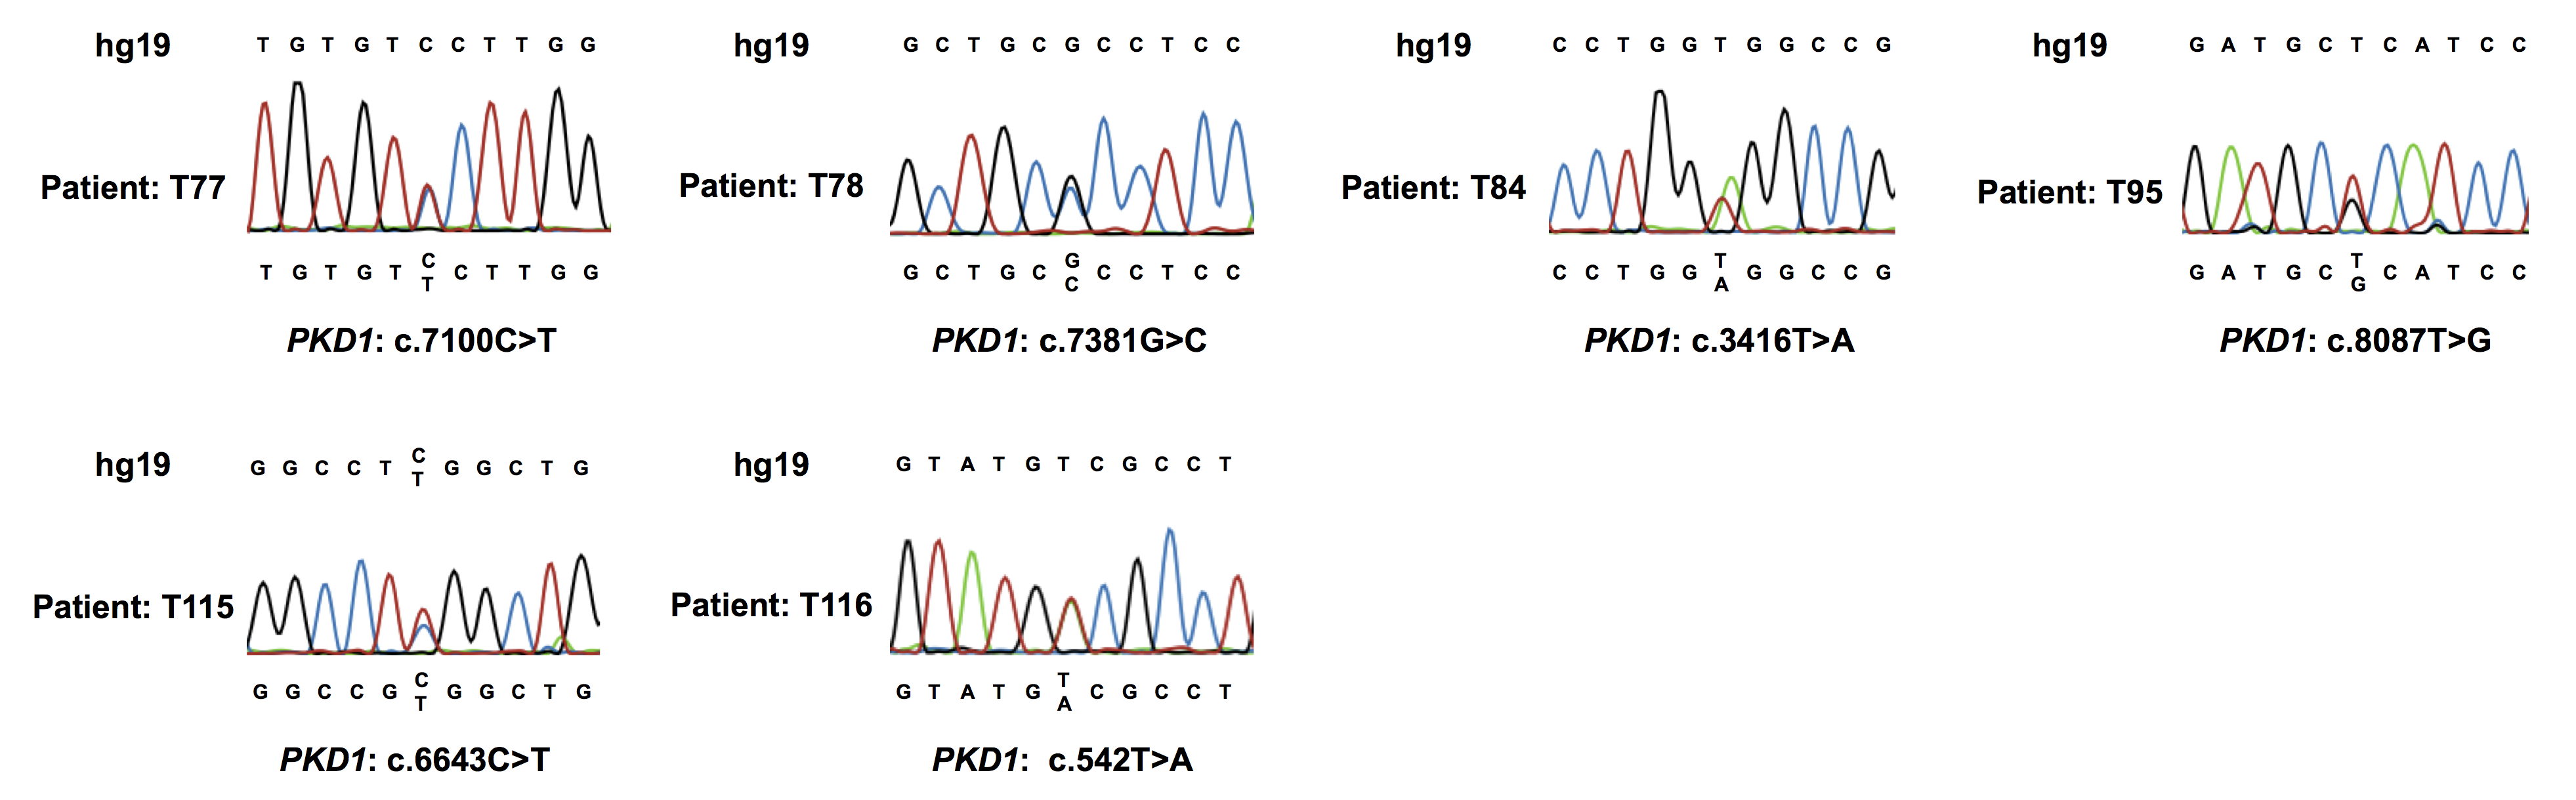
**
